# Supplementary material for: Pyrrolidine-based 3-deoxysphingosylphosphorylcholine analogs as possible candidates against neglected tropical diseases (NTDs): identification of hit compounds towards development of potential treatment of Leishmania donovani
Source: PubMed Central journal article supplement (PMC8386730; doi:10.1080/14756366.2021.1969385), 2021-08-23
Supplement: IENZ_A_1969385_SM1637.pdf [file IENZ_A_1969385_SM1637.pdf]

Supporting Information

**Pyrrolidine-based 3-deoxysphingosylphosphorylcholine analogs as possible candidates against neglected tropical diseases (NTDs): Identification of hit compounds towards development of potential treatment of *Leishmania donovani***

**Ahmed H.E. Hassan<sup>a,b,1</sup>, Trong-Nhat Phan<sup>c,1</sup>, Seolmin Yoon<sup>d</sup>, Cheol Jung Lee<sup>d</sup>, Hye Rim Jeon<sup>d</sup>, Seung-Hwan Kim<sup>d</sup>, Joo Hwan No<sup>c\*</sup>, Yong Sup Lee<sup>b,d\*</sup>**

<sup>a</sup> *Department of Medicinal Chemistry, Faculty of Pharmacy, Mansoura University, Mansoura 35516, Egypt.*

<sup>b</sup> *Medicinal Chemistry Laboratory, College of Pharmacy, Kyung Hee University, Seoul 02447, Republic of Korea.*

<sup>c</sup> *Leishmania Research Laboratory, Institut Pasteur Korea, Seongnam-si, Gyeonggi-do 13488, Korea.*

<sup>d</sup> *Department of Life and Nanopharmaceutical Sciences, Kyung Hee University, Seoul 02447, Republic of Korea.*

<sup>1</sup> Both of Ahmed H.E. Hassan and Trong-Nhat Phan have contributed equally. Accordingly, they should be recognized as co-first authors.

\***Corresponding authors:** Yong Sup Lee (e-mail: [kyslee@khu.ac.kr](mailto:kyslee@khu.ac.kr)) and Joo Hwan No (e-mail: [joohwan.no@ip-korea.org](mailto:joohwan.no@ip-korea.org)).

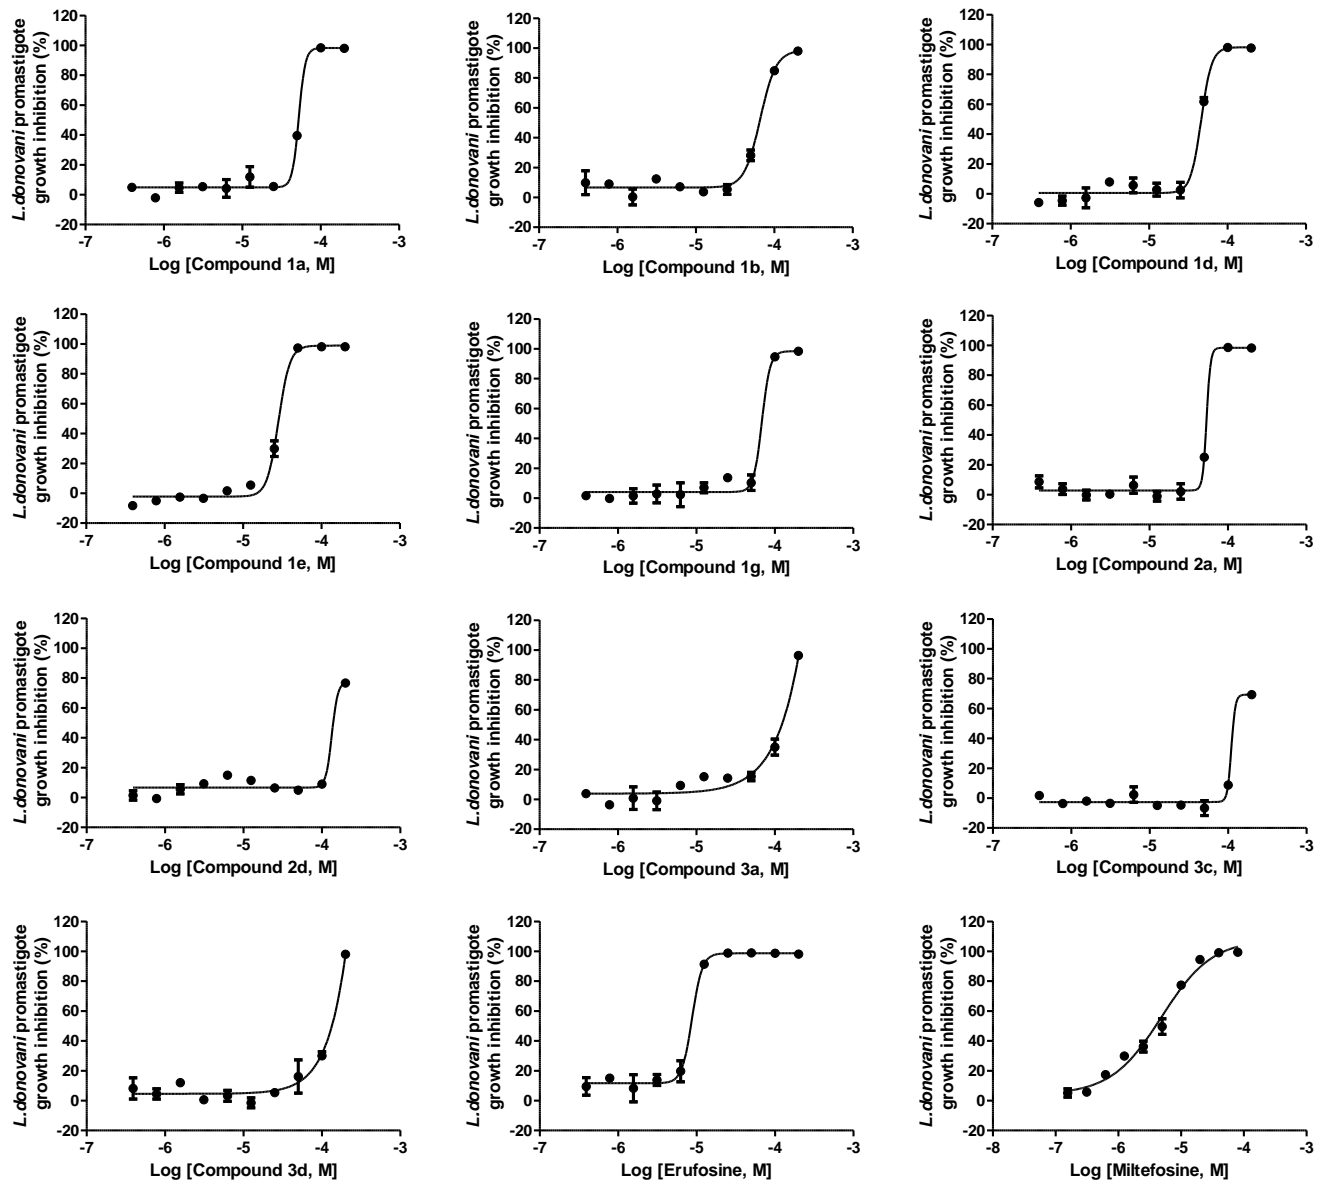

Dose-response curves of the standard erufosine, miltefosine and the hit compounds against *L. donovani* promastigote growth. The results are expressed as mean standard deviation values of duplicate experiments.

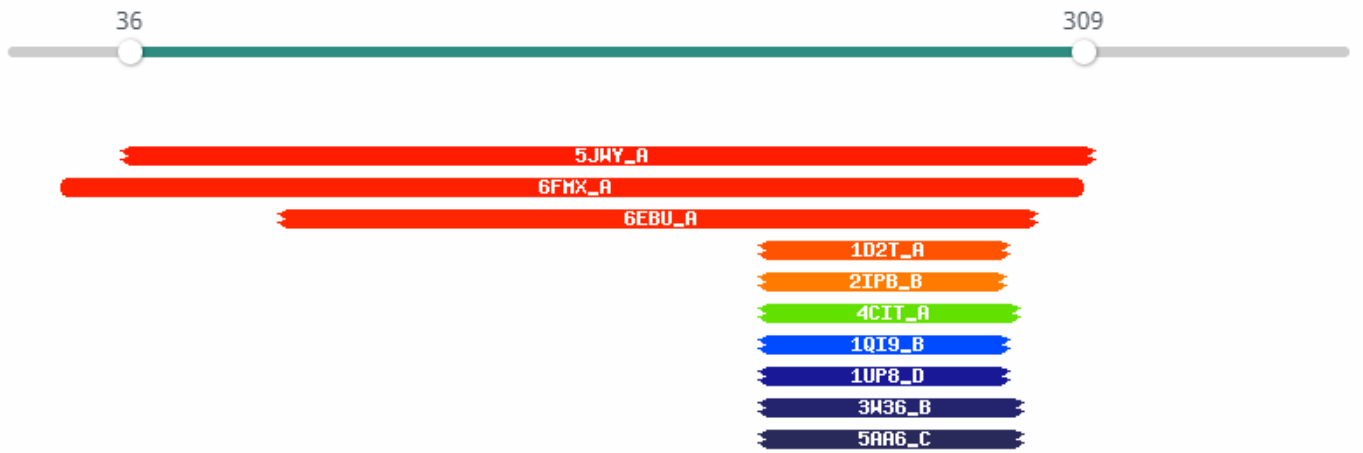

Templates retrieved for Sequence of IPCS of *Leishmania donovani* (Uniport ID: E9BT22)



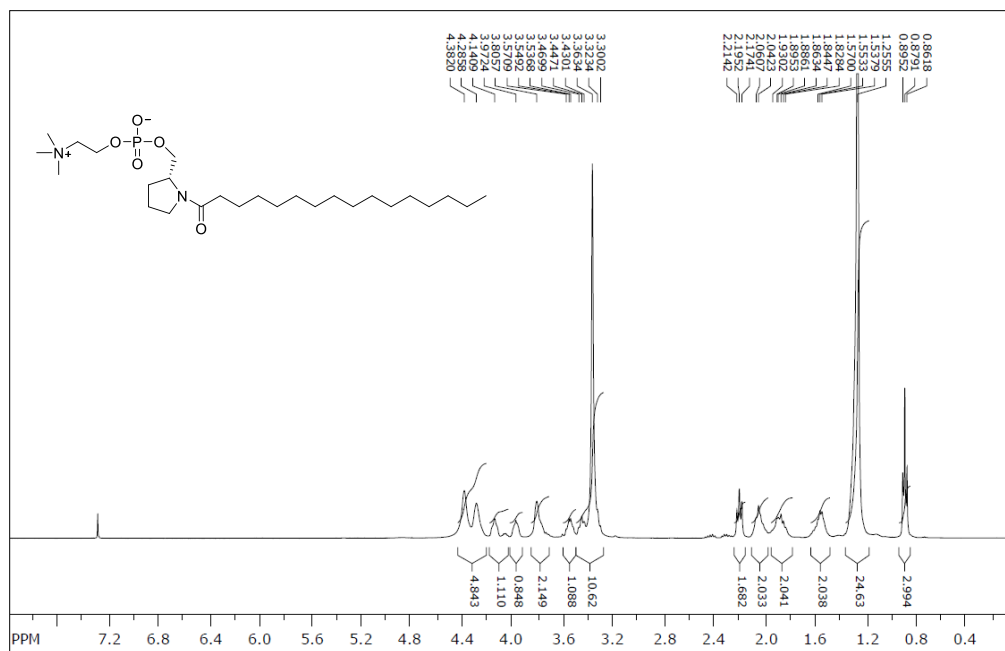

<sup>1</sup>H NMR spectra of compound **1a**

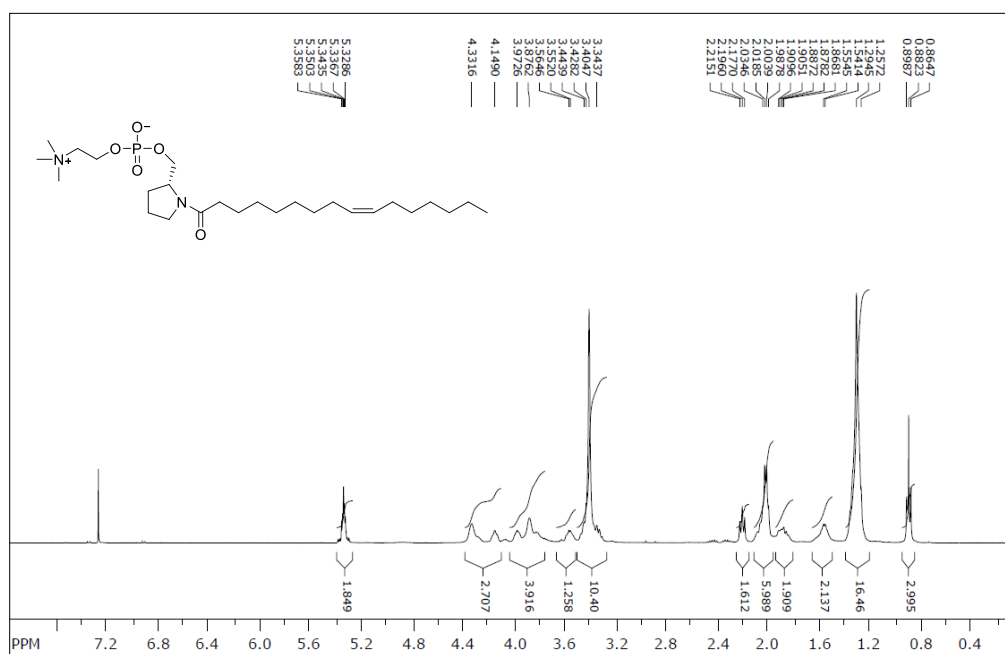

<sup>1</sup>H NMR spectra of compound **1b**

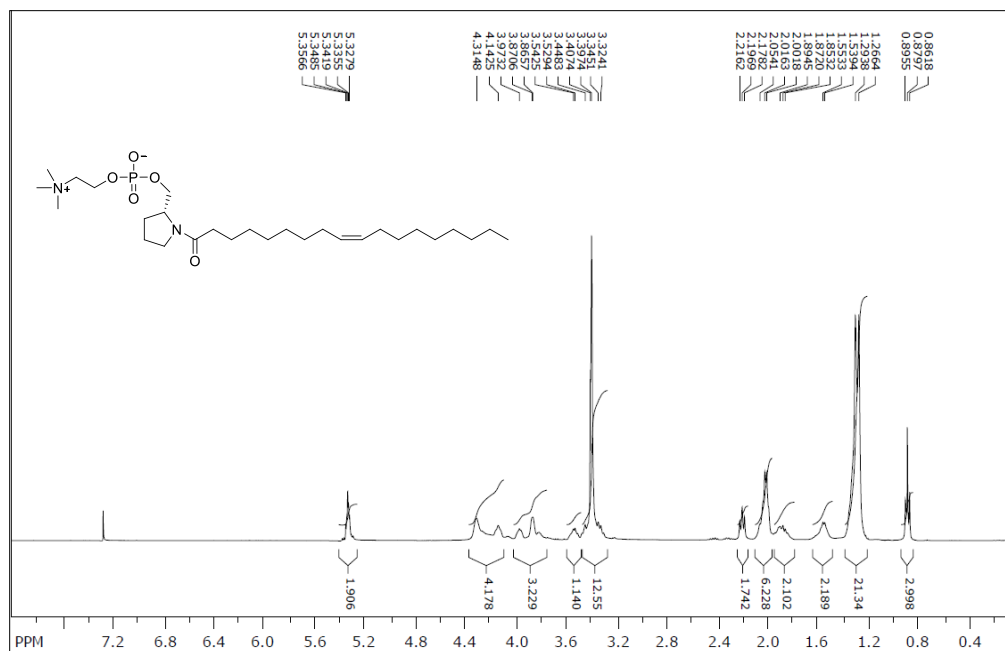

<sup>1</sup>H NMR spectra of compound 1c

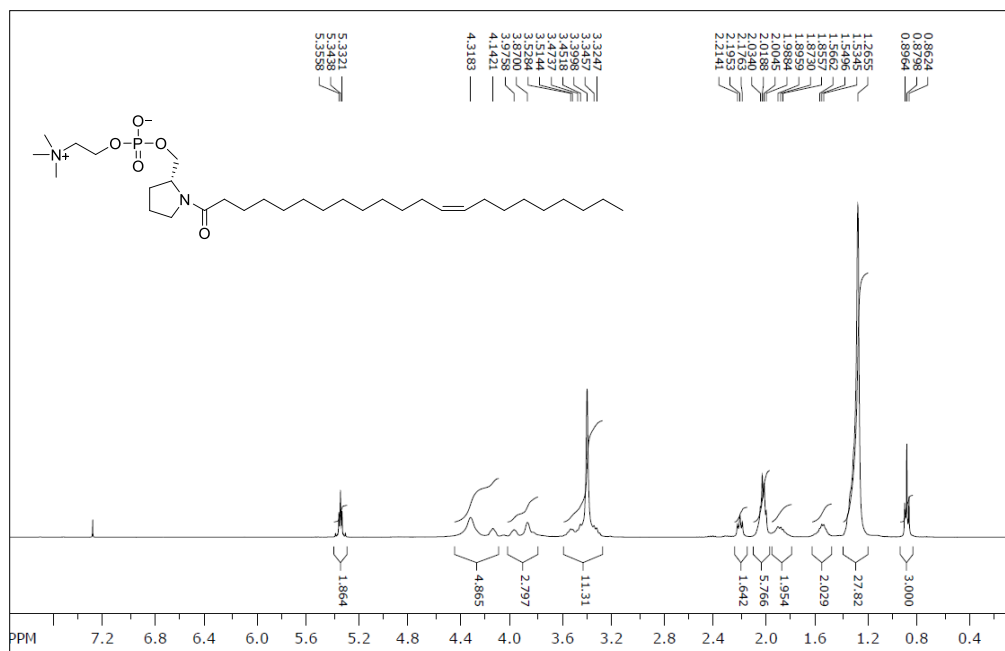

<sup>1</sup>H NMR spectra of compound 1d

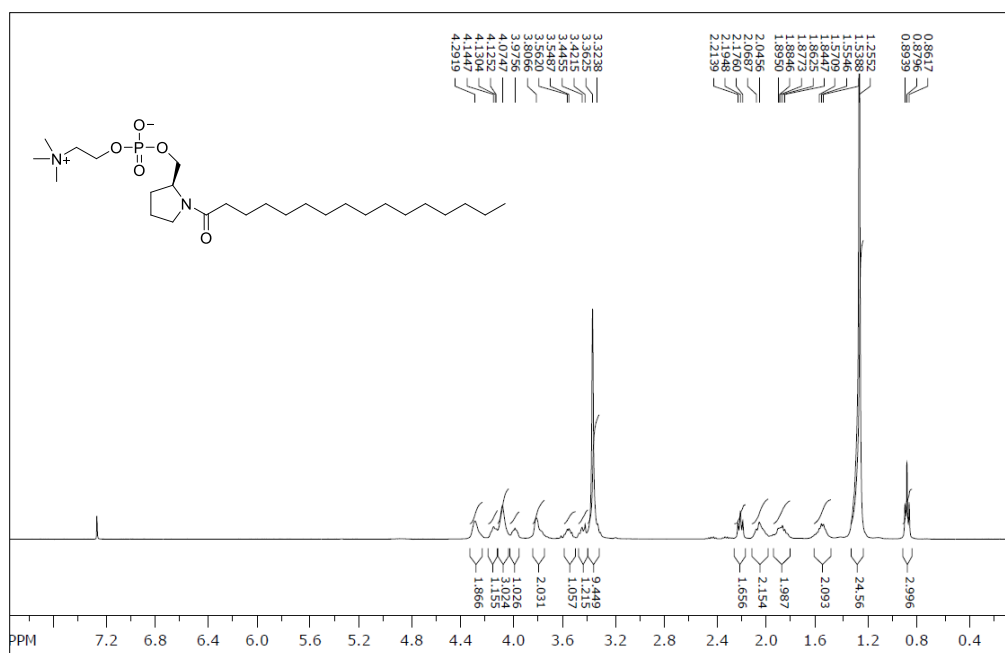

<sup>1</sup>H NMR spectra of compound 1e

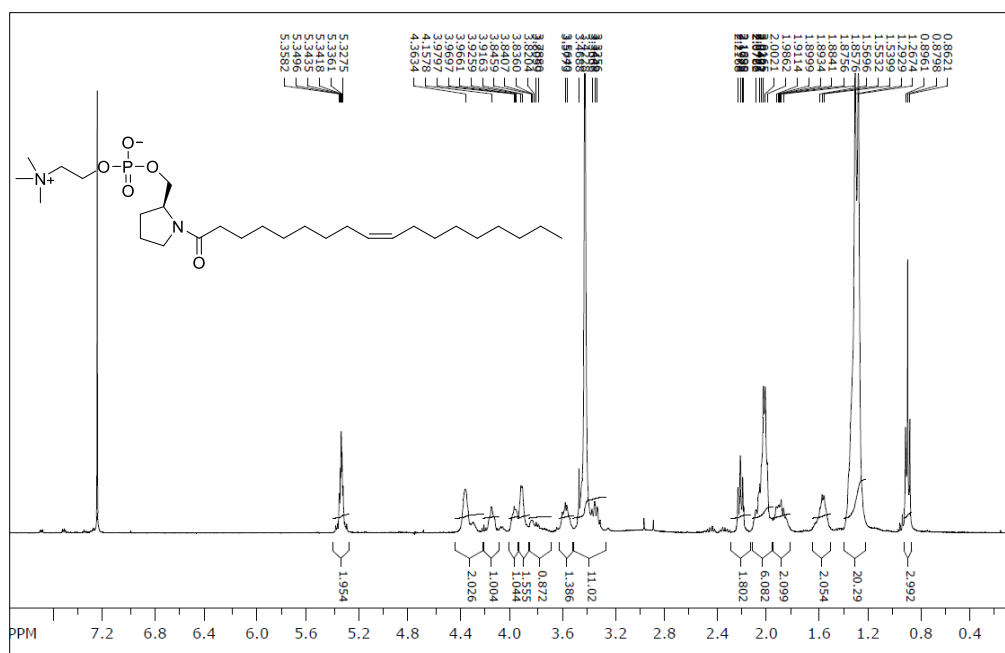

<sup>1</sup>H NMR spectra of compound 1f







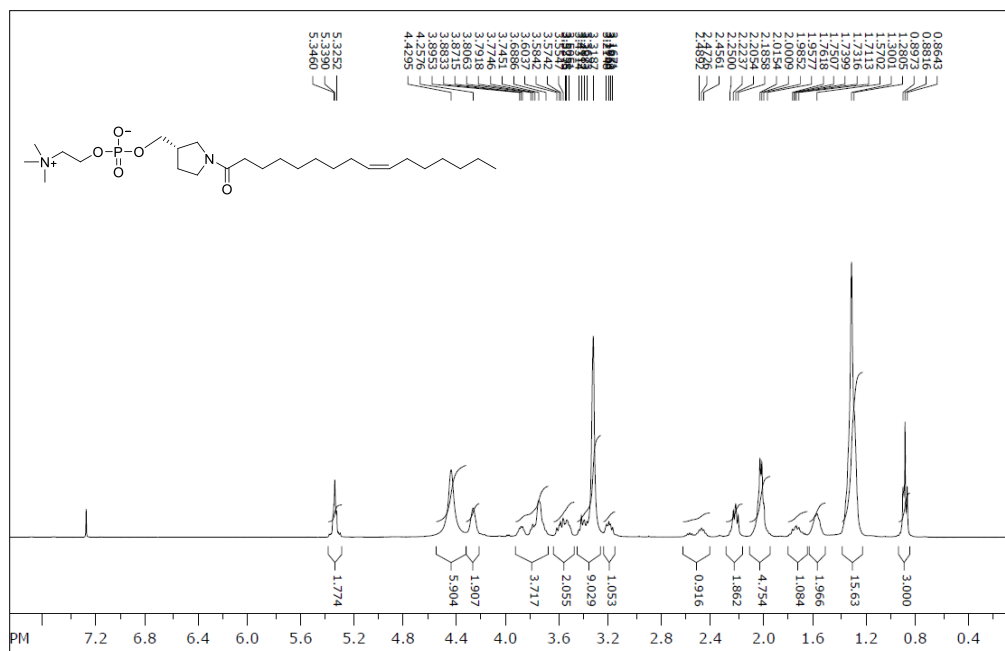

<sup>1</sup>H NMR spectra of compound 2b

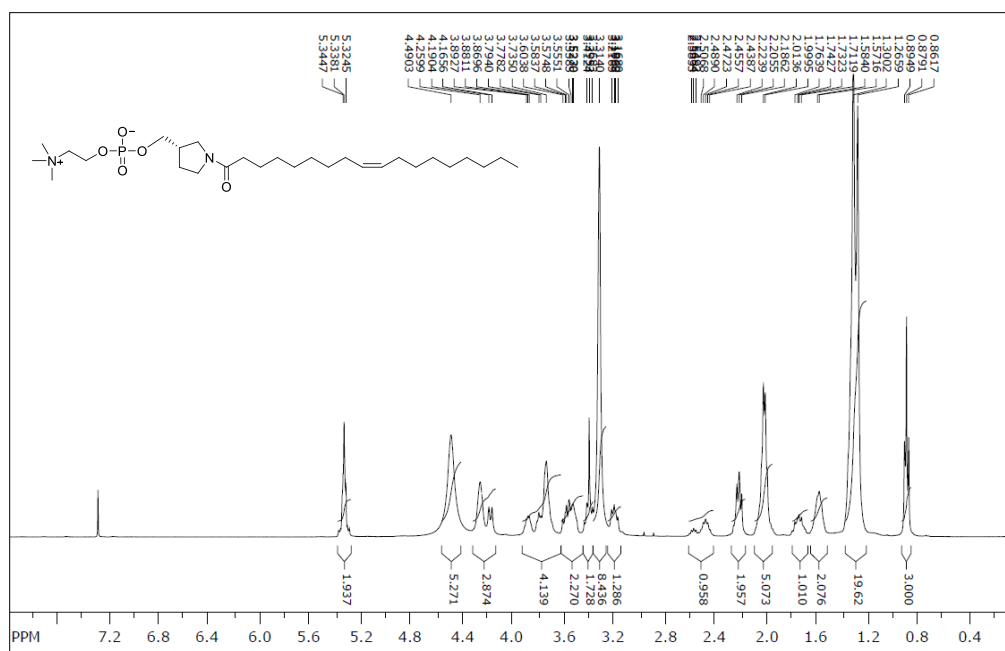

<sup>1</sup>H NMR spectra of compound 2c



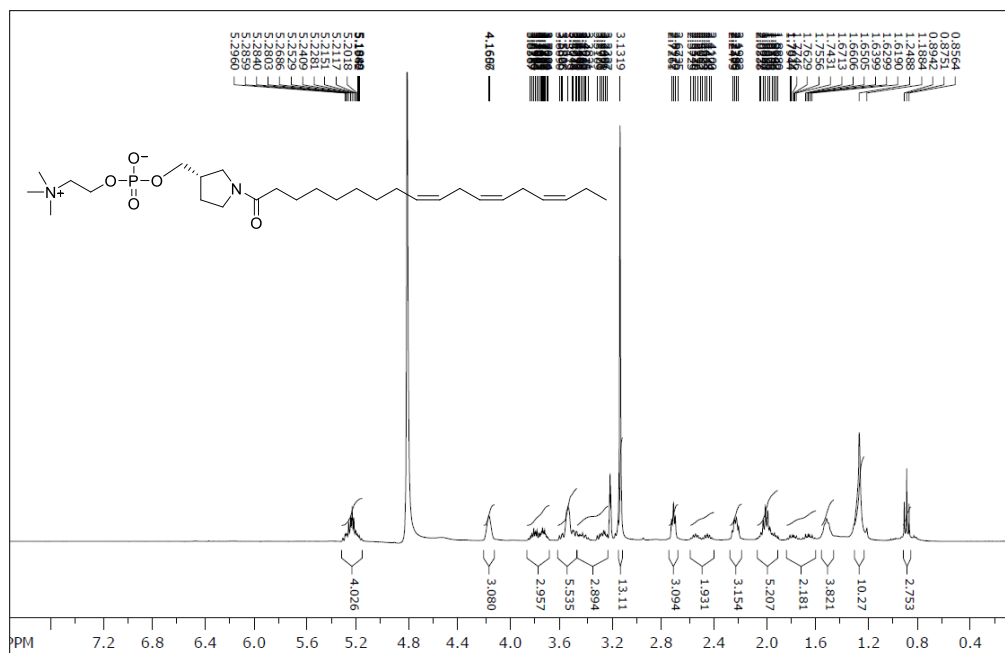

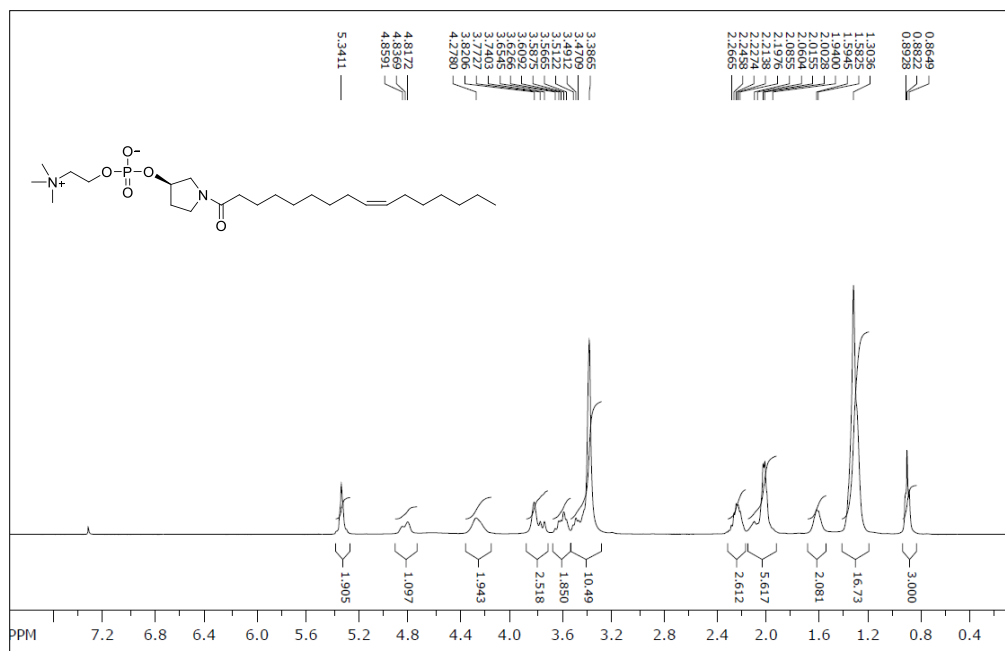

<sup>1</sup>H NMR spectra of compound 3b

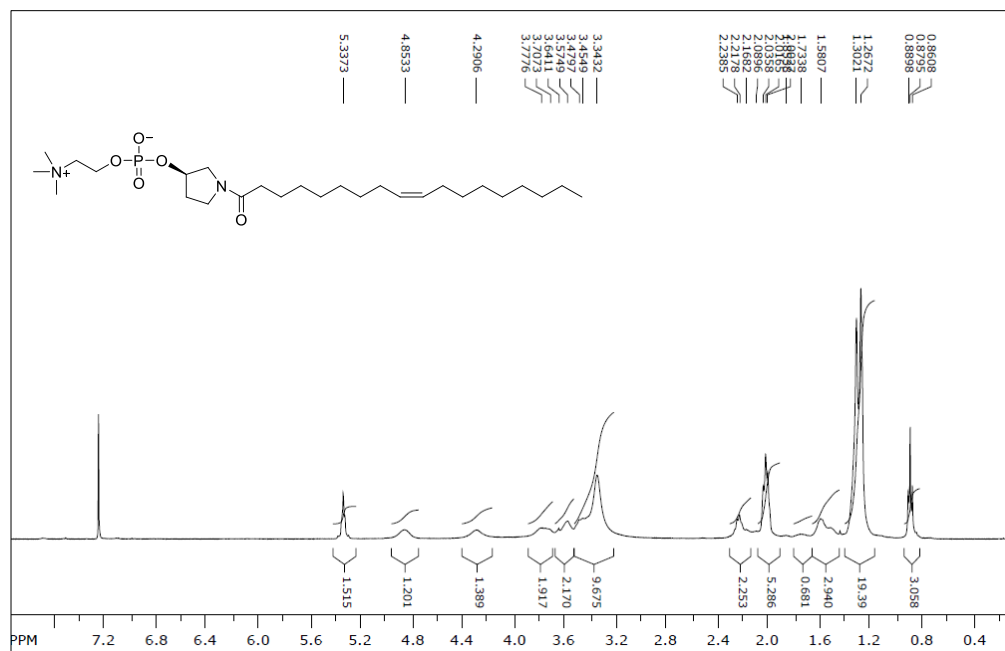

<sup>1</sup>H NMR spectra of compound 3c

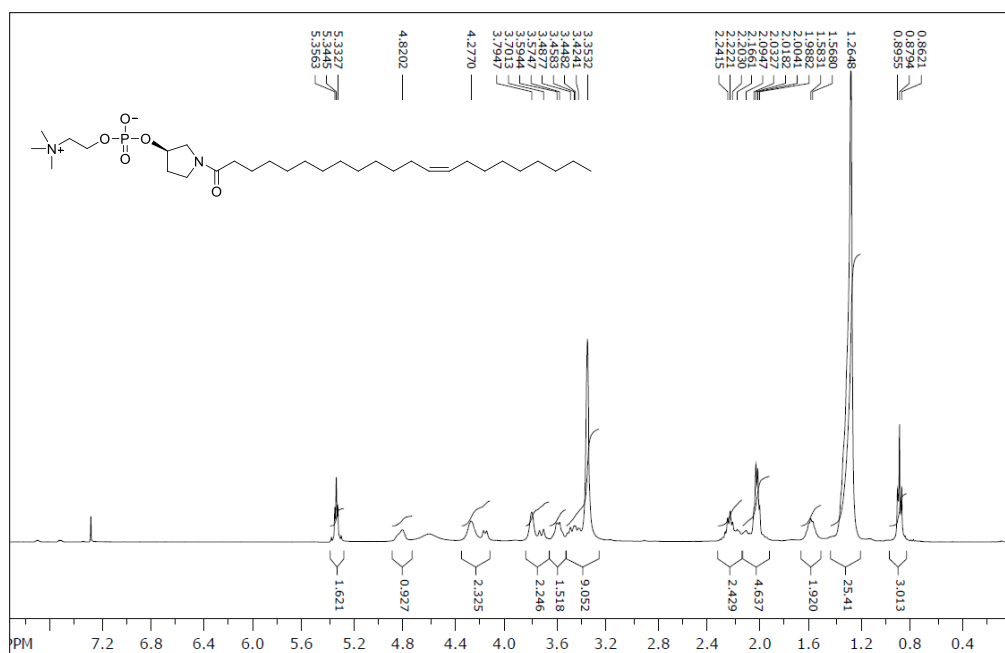

<sup>1</sup>H NMR spectra of compound 3d

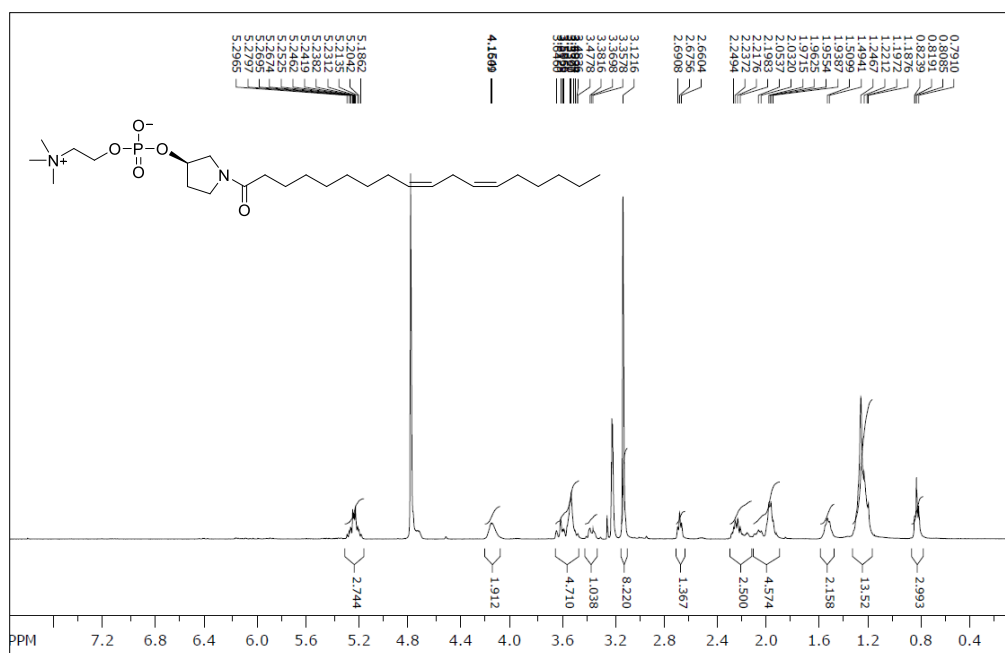

<sup>1</sup>H NMR spectra of compound 3e

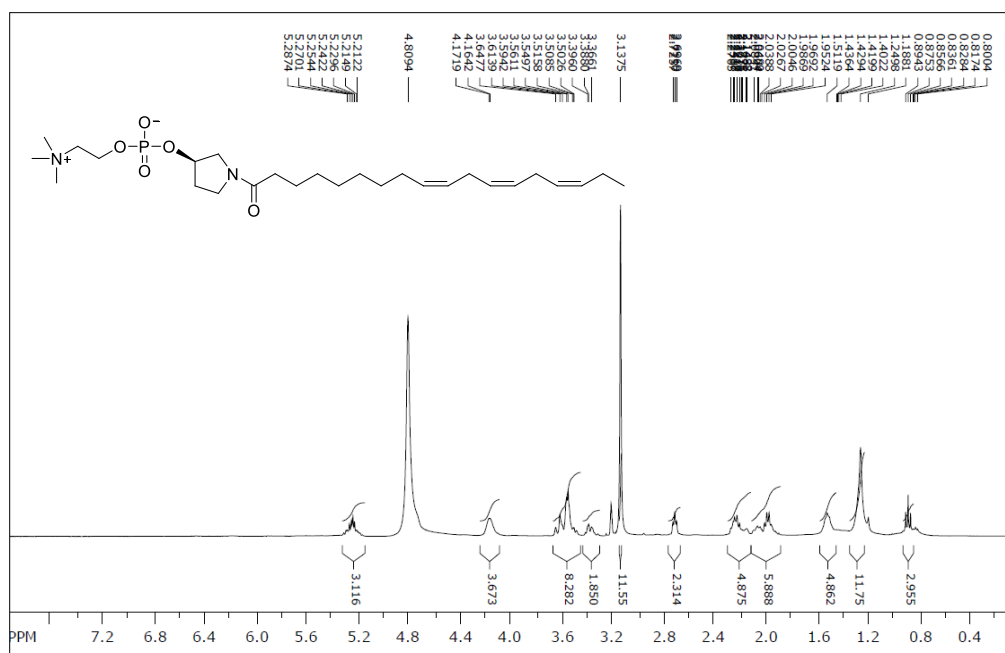

<sup>1</sup>H NMR spectra of compound **3f**
